# **celldeth: a tool for detection of cell death in transmitted light microscopy images by deep learning-based visual recognition**

Alejandro La Greca <sup>a\*</sup>

Nelba Pérez <sup>a\*</sup>

Sheila Castañeda <sup>a</sup>

Paula Melania Milone, <sup>a</sup>

María Agustina Scarafía <sup>a</sup>

Alan Miqueas Möbbs <sup>a</sup>

Ariel Waisman <sup>a,b</sup>

Lucía Moro <sup>a,b</sup>

Gustavo Sevlever <sup>a</sup>

Carlos Luzzani <sup>a,b</sup>

Santiago Gabriel Miriuka <sup>a,b‡</sup>

<sup>a</sup>Laboratorio de Investigación Aplicada a Neurociencias, FLENI-CONICET, Buenos Aires, Argentina.

<sup>b</sup>Consejo Nacional de Investigaciones Científicas y Técnicas (CONICET), Ciudad Autónoma de Buenos Aires, Argentina.

\* These authors contributed equally to this work

‡ Corresponding author: [smiriuka@fleni.org.ar](mailto:smiriuka@fleni.org.ar)

## ***Lead Contact***

Santiago Gabriel Miriuka

## ***Running title***

Cell death detection by deep learning.

## ***Competing interest***

The authors declare no competing interest.

# celldeath: a tool for detection of cell death in transmitted light microscopy images by deep learning-based visual recognition

Alejandro La Greca<sup>a\*</sup>, Nelba Pérez<sup>a\*</sup>, Sheila Castañeda<sup>a</sup>, Paula Melania Milone,<sup>a</sup> María Agustina Scarafía<sup>a</sup>, Alan Miqueas Möbbs<sup>a</sup>, Ariel Waisman<sup>a,b</sup>, Lucía Moro<sup>a,b</sup>, Gustavo Sevlever<sup>a</sup>, Carlos Luzzani<sup>a,b</sup>, Santiago Gabriel Miriuka<sup>a,b‡</sup>

<sup>a</sup>Laboratorio de Investigación Aplicada a Neurociencias, FLENI-CONICET, Buenos Aires, Argentina.

<sup>b</sup>Consejo Nacional de Investigaciones Científicas y Técnicas (CONICET), Ciudad Autónoma de Buenos Aires, Argentina.

\* These authors contributed equally to this work

‡ Corresponding author: [smiriuka@fleni.org.ar](mailto:smiriuka@fleni.org.ar)

---

## Abstract

Cell death experiments are routinely done in many labs around the world, these experiments are the backbone of many assays for drug development. Cell death detection is usually performed in many ways, and requires time and reagents. However, cell death is preceded by slight morphological changes in cell shape and texture. In this paper, we trained a neural network to classify cells undergoing cell death. We found that the network was able to highly predict cell death after one hour of exposure to camptothecin. Moreover, this prediction largely outperforms human ability. Finally, we provide a simple python tool that can broadly be used to detect cell death.

*Keywords:* cell death, apoptosis, deep learning, machine learning, artificial intelligence, computer vision, neural networks, microscopy

---

## 1 Introduction

2 In the past few years there has been an in-  
3 creasing interest in artificial intelligence. The  
4 combination of newer algorithms for mod-  
5 elling biological data and increasing com-  
6 putational capacities have sparked an over-  
7 whelming amount of research for academic  
8 and biomedical purposes (Lee et al., 2017).  
9 In particular, deep learning (DL) models in-  
10 spired in neural networks (NN) have proved to  
11 be powerful. These models, called convolu-  
12 tional neural networks (CNN), employ back-  
13 propagation algorithms to reconfigure its pa-  
14 rameters in successive layers while attempt-

ing to represent the input data (LeCun et al., 15  
2015), allowing them to classify complex and 16  
large sets of information, including digital im- 17  
ages. Therefore, one of the most active fields 18  
is image recognition (Camacho et al., 2018; 19  
Voulodimos et al., 2018). 20

Cell death is a complex event found in nor- 21  
mal and pathological contexts (D’Arcy, 2019). 22  
For this reason, it is widely studied in biomed- 23  
ical research and it is a hallmark of many ex- 24  
periments, particularly in the context of drug 25  
discovery (Kabore et al., 2004; Merino et al., 26  
2018). Many different assays have been de- 27  
veloped in the past decades in order to analyse 28  
cell death. All of them involve the analysis of 29

30 particular features of a dying cell, including  
31 DNA fragmentation, cell membrane protein  
32 flipping, protein modifications, etc (Elmore,  
33 2007; Majtnerová and Roušar, 2018; Kay and  
34 Fairn, 2019). In any case, there is need for time  
35 and money in order to perform these assays.  
36 An interesting approach by Chen and collabora-  
37 tors using weakly supervised CNN models  
38 demonstrated that they could confidently de-  
39 tect and count dead cells in brightfield images  
40 of cell cultures (Chen et al., 2019).

41 Recently, we published that NN can be  
42 used to classify transmitted light microscopy  
43 (TLM) images of differentiating pluripotent  
44 stem cells at one hour and even less, with an  
45 accuracy higher than 99% (Waisman et al.,  
46 2019). Hence, we demonstrated that apply-  
47 ing DL over TLM images can be a power-  
48 ful technology for specific purposes: we can  
49 identify the early stages of complex processes  
50 like differentiation or cell death, with nearly no  
51 money spent and with high precision. Exper-  
52 imental confirmation of these processes other-  
53 wise would require the use of an assay often  
54 involving time and money in several orders of  
55 magnitude. We are confident that our experi-  
56 ence and that of many others will radically  
57 change the way fields in biology are engaged  
58 (Webb, 2018; Moen et al., 2019).

59 In the present work we aimed to develop a  
60 simple tool for easy, fast and accurate clas-  
61 sification of cell death in culture using TLM  
62 images. We believe that this tool can be used  
63 in any scientific lab running cell death experi-  
64 ments, particularly in those cases when mas-  
65 sive and repetitive experimental settings are  
66 needed such as drug screening in cancer re-  
67 search.

## 68 Results

69 We defined a cell death model in all cell  
70 lines used in this work -three pluripotent stem

cell (PSC) lines and four cancer cell (CC) 71  
lines- by incubating them with camptothecin 72  
(CPT), a topoisomerase I inhibitor. We have 73  
previously demonstrated that this molecule in- 74  
duces a very rapid cell death signaling in hu- 75  
man embryonic stem cells that derives in apop- 76  
tosis García et al. (2014). In each of the seven 77  
cell lines we titrated drug concentration and 78  
exposure time and took TLM images hourly in 79  
both DMSO (vehicle) and CPT-treated cells. 80

To confirm that these cell lines were un- 81  
dergoing apoptosis we performed different 82  
assays. Inhibition of topoisomerase I re- 83  
sults in replication-dependent DNA double 84  
strand breaks (DBSs) Strumberg et al. (2000), 85  
which lead to the phosphorylation of H2AX 86  
( $\gamma$ H2AX) and activation of tumour suppres- 87  
sor protein p53 Sedelnikova et al. (2003); Sor- 88  
det et al. (2009). Consistently, iPS1 pluripo- 89  
tent stem cells treated with CPT  $1\mu\text{M}$  for 90  
1.5h showed an increment in nuclear signal of 91  
 $\gamma$ H2AX as well as accumulation of p53 (Fig 92  
1A). Compared to vehicle, the distributions of 93  
nuclear signals were significantly different for 94  
both marks (Fig 1B). We observed similar re- 95  
sults in H9 embryonic stem cells and in iPS2 96  
induced pluripotent stem cells. 97

Significant CPT-dependent activation and 98  
nuclear localization of  $\gamma$ H2AX and p53 (vs. 99  
DMSO) were also found in MCF7 cancer cell 100  
line at 6h of treatment (Fig 1C and D). All 101  
CC lines showed similar results between 3 and 102  
6h of treatment with CPT. Interestingly, al- 103  
though CC lines generally evince high prolif- 104  
eration rates, they were practically unaffected 105  
by  $1\mu\text{M}$  treatment with CPT and a concen- 106  
tration of  $10\mu\text{M}$  was necessary to induce the 107  
apoptogenic signaling. 108

Longer treatments with CPT resulted in a 109  
steady  $\gamma$ H2AX and p53 nuclear signal in iPS1 110  
and MCF7 cells compared to vehicle (S1 FigA 111  
and B), indicating that CPT treatment effec- 112  
tively triggers a sustained response to damaged 113

114 DNA in both PSC and CC lines.

115 Apoptosis is a complex process and one  
116 of its earliest characteristic features is phos-  
117 phatidylserine (PS) exposure on the outer side  
118 of the cell membrane Nagata et al. (2016).  
119 Identification of PS residues on the surface of  
120 intact cells through its interaction with An-  
121 nexin V protein enables detection of early  
122 stages of apoptosis by flow cytometry analy-  
123 sis. Treatment with CPT between 3 and 6h sig-  
124 nificantly increased the percentage of PS<sup>+</sup>/7-  
125 AAD<sup>-</sup> cells (Q3) compared to vehicle in both  
126 iPS1 and MCF7 cells (Fig 1E and F, respec-  
127 tively). Positive values for each quadrant were  
128 determined using single stained and double  
129 stained untreated samples (S1 FigC and D).

130 Taken together, these results indicate that  
131 CPT treatment induced damage to DNA which  
132 eventually resulted in cell death by apoptosis  
133 in PSC and CC lines.

#### 134 *CNN training and overall performance*

135 Transmitted light microscopy images from  
136 all cell lines were taken at 1, 2 and 3h post  
137 induction of cell death with CPT. Minor mor-  
138 phological changes, if any, are observed by the  
139 first hour for all cell lines (Fig 2). In fact,  
140 deep and thorough observation is needed to  
141 capture subtle alterations in a few cell lines.  
142 For example, some degree of cell-to-cell de-  
143 tachment was registered in PSC lines as well as  
144 in T47D cells, and in PC3 cells, increased cell  
145 volume was observed in a portion of the im-  
146 ages. However, none of these were markedly  
147 noticeable features and they were only present  
148 in a fraction of the images. Although later  
149 timepoints evinced more pronounced morpho-  
150 logical changes (cell shrinkage, further de-  
151 tachment, nuclear condensation), they were  
152 not easily or readily detected without proper  
153 preparation.

154 Considering these minor morphological  
155 changes, we challenged 5 experienced re-

156 searchers (who had never seen the images be-  
157 fore) to correctly classify a randomly-picked  
158 set of 50 1h images (pre-training) as CPT or  
159 DMSO (vehicle). After the initial trial (with-  
160 out revealing performance), we “trained” the  
161 researchers by showing them 500 labelled im-  
162 ages (CPT or DMSO) and then asked them to  
163 classify a new set of 50 images (post-training).  
164 Selection of images for trials and trainings  
165 was performed regardless of cell line or treat-  
166 ment. Classification performance by investiga-  
167 tors before and after training was completely  
168 random (close to 50% correct answers), indi-  
169 cating that they failed to retrieve specific fea-  
170 tures which unequivocally identified each la-  
171 bel (Fig 3A, grey bars). Moreover, decision  
172 making was mostly independent of image-  
173 related biases as very few “all incorrect” an-  
174 swers were registered for any given image (S2  
175 Fig).

176 To assess whether deep learning-based  
177 models could outdo human performance in  
178 the early assay-free detection of cell death  
179 features, we trained a Convolutional Neural  
180 Network (CNN) using 1h CPT- and DMSO-  
181 treated images from all cell lines. The trained  
182 CNN was able to correctly classify between 9  
183 and 10 out of 10 images in the validation and  
184 test sets (98.18pm0.33% and 96.56pm0.24%  
185 accuracy, respectively; see Methods for def-  
186 inition on validation and test sets) (Fig 3A,  
187 blue bars). Results presented here are based  
188 on ResNet50 NN architecture, though other ar-  
189 chitectures showed similar results (ResNet34:  
190 98% accuracy during validation and 95% in  
191 test) (S3 FigA). While CNN robustness has  
192 been extensively tested in many situations  
193 Anzanello and Fogliatto (2011), learning is-  
194 sues due to model set up -namely underfitting  
195 and overfitting Pérez-Enciso and Zingaretti  
196 (2019)- are not uncommon and they are of-  
197 ten associated to an unsuitable number of user-  
198 defined parameters for representing input data

199 (too few or too many). Incremental learn- 241  
200 ing of our CNN through each epoch (iterative 242  
201 process by which all samples in dataset took 243  
202 part in updating weights and parameters of the 244  
203 model) was diagnosed by simultaneously assess- 245  
204 ing the Loss function in the training and 246  
205 validation sets (Fig 3B). A minimum value in 247  
206 Loss function was achieved within 50 epochs, 248  
207 when both the training and validation sets con- 249  
208 verged at a loss value close to zero (stabi- 250  
209 lization). Extended training periods (over 200 251  
210 epochs) did not dramatically improve accuracy 252  
211 values (S3 FigA) or loss function outcome (S3 253  
212 FigB). 254

213 Learning curves (loss function) clearly 255  
214 showed that our model was not only suitable, 256  
215 but also capable of learning from input data 257  
216 (i.e. non-flat training curves) which is not the 258  
217 case in underfitted models. However, reduced 259  
218 generalization capabilities of the model (over- 260  
219 fitting) are sometimes more difficult to detect 261  
220 considering that in fact the model is learning 262  
221 too well from training set. To test for this 263  
222 possibility we trained our model for over 100 264  
223 epochs and found a potential inflection point 265  
224 (validation curve starts to increase over train- 266  
225 ing curve) around 280 (S3 FigB), which sug- 267  
226 gests that our model was well-fitted and only 268  
227 exhibited overfitting if trained for excessive 269  
228 periods of time. 270

### 229 *CNN identifies very early features of cell death*

230 Grouping all cell lines and training the NN 271  
231 with only two classes (or labels), reduced po- 272  
232 tential outcomes to a binary choice between 273  
233 CPT or DMSO (vehicle). The final goal in this 274  
234 scenario was to train a model where, irrespec- 275  
235 tive of cell basal morphology, the CNN was 276  
236 able to identify cell death. As pointed out be- 277  
237 fore (CNN vs. human), successful classifica- 278  
238 tion at 1h was very high (average accuracy of 279  
239 five runs in the validation set of  $98.18 \pm 0.33\%$  280  
240 and  $96.58 \pm 0.24\%$  in the test set), reaching 281

241 maximum accuracy values for validation and 242  
243 test sets of 98.67% and 97.23%, respectively, 244  
245 when we compared all non-exposed (DMSO) 246  
247 images versus all exposed ones (CPT) (Table 248  
249 1). Moreover, employing a pretrained model, 250  
251 in which starting weights are defined before- 252  
253 hand rather than randomly initialized, on the 254  
255 same setting (imagenet CsvD) did not improve 256  
257 accuracy. Appropriate visual description for 258  
259 classification performance of our model was 260  
261 rendered as a confusion matrix, in which pre- 262  
263 dictions on each image were contrasted to ac- 264  
265 tual labels (true value). In coherence with 266  
267 accuracy values, the matrix showed very few 268  
269 misclassification events for the total 4,188 im- 269  
270 ages consisting of 65 false positives (predicted 271  
272 CPT, but actually DMSO) and 52 false nega- 273  
274 tives (predicted DMSO, but actually CPT) (Fig 274  
275 3C). Furthermore, we found that employing 276  
277 the same model on longer exposure times to 277  
278 CPT (2 and 3h) slightly favoured an increase 278  
279 in validation accuracy and attenuated false de- 279  
280 tection, probably because drug-associated ef- 280  
281 fects became more pronounced (S3 FigC and 281  
282 D). 282

266 To further test our model, we trained the 266  
267 NN to classify each cell line in each treatment 267  
268 (ALL vs. ALL) demonstrating a good per- 268  
269 formance as well (Fig 3D). In this case, clas- 269  
270 sification was considerably improved by us- 270  
271 ing a pretrained model (imagenet AvsA), with 271  
272 a final highest accuracy of 87% in the test 272  
273 set (Table 1). Although the matrix showed 273  
274 very few misclassification events in general, 274  
275 the model frequently confused DMSO-treated 275  
276 iPS1 for DMSO-treated iPS2 and CPT-treated 276  
277 iPS1 for CPT-treated iPS2 (Fig 3E), probably 277  
278 due to their induced-pluripotent nature. Import- 278  
279 tantly, it rarely failed to discriminate CPT from 279  
280 DMSO. This diagonally-populated matrix indi- 280  
281 cates that the CNN was capable of identi- 281  
282 fying cell-specific death features to correctly 282  
283 discriminate all labels (predicted=actual). We 283

284 corroborated this finding by training, validating  
285 and testing the CNN with each cell line  
286 individually (Table 1), and again classification  
287 performance was excellent, indicating that the  
288 model can be confidently and easily applied to  
289 single or multicellular experimental layouts.

290 However, we discovered that if we pur-  
291 posely set aside all images of one cell line dur-  
292 ing training, in some cases our model showed  
293 reduced capacity to discriminate CPT from  
294 DMSO images of that cell line during test-  
295 ing (Valid. accuracy >> Test accuracy). Even  
296 though validation accuracies were remarkably  
297 high for all training sets (Fig 3F), the model  
298 failed to accurately discriminate labels during  
299 testing with PC3 (53%) and U2OS (64%) can-  
300 cer cell lines (Table 2). In contrast, testing on  
301 the other cell lines resulted in accuracy val-  
302 ues over 75%, particularly in PSC lines, which  
303 means that the CNN was partially able to clas-  
304 sify images from “unknown” cells. Thus we  
305 believe that some features found useful for  
306 classification during validation might be ex-  
307 trapolated to unseen cell lines, but that highly  
308 cell-specific facets may interfere with pattern  
309 matching. Therefore, it is preferable that train-  
310 ing of our model includes the cell line on  
311 which cell death prediction is intended.

312 Finally, we analysed the images in search  
313 of the features which potentially contributed  
314 the most to classification. To do so we em-  
315 ployed class activation maps (CAM) that re-  
316 construct heatmap-like visualizations merging  
317 the information provided by the last convolu-  
318 tional layer and the model predictions Zhou  
319 et al. (2015). In other words, these heatmaps  
320 represent the score of each feature used dur-  
321 ing the decision making process as a colour-  
322 guided graphic which may facilitate human  
323 interpretation. Even though it was not clear  
324 which characteristics were in fact supporting  
325 the decision, our results demonstrate that clas-  
326 sification was based upon features present in

cell-occupied regions of the images (high acti- 327  
vation areas) (Fig 4). 328

## 329 Discussion

330 Deep learning techniques are being increas-  
331 ingly used in the biomedical field (Cao et al.,  
332 2018; Moen et al., 2019). Specifically for de-  
333 tection of morphological changes, we (Wais-  
334 man et al., 2019) and others (Chen et al., 2016;  
335 Ounkomol et al., 2018; Richmond et al., 2017;  
336 Jimenez-Carretero et al., 2018) have previ-  
337 ously applied deep learning for different ex-  
338 perimental approaches using TLM. For exam-  
339 ple, Ounkomol *et al* provided evidence that a  
340 DL model can predict immunofluorescence in  
341 TLM cells (Ounkomol et al., 2018). Jimenez-  
342 Carretero *et al* predicted fluorescent toxic-  
343 ity looking at changes in stained cell nuclei  
344 (Jimenez-Carretero et al., 2018). In a simi-  
345 lar paper than ours, Richmond *et al* applied  
346 a CNN on TLM images in order to predict  
347 phototoxicity, but their accuracy was approx-  
348 imately 94.5%, probably related to the shal-  
349 low network they used. Moreover, it took them  
350 16h of training to reach this level, whereas our  
351 model gets  $\approx 99\%$  accuracy in approximately  
352 3-4h using a similar hardware. Finally, they  
353 did not provide any easy way to reproduce and  
354 apply their findings.

355 In this work we showed that convolutional  
356 neural networks can be trained to recognize  
357 very early features of cell death. We trained  
358 the NN with images taken just after one hour  
359 of starting cell death induction, at which point  
360 the human eye was unable to identify mor-  
361 phological changes to correctly classify a set  
362 of images. We conducted a standard “single-  
363 blind” test in which several trained investi-  
364 gators from our institution assessed a set of  
365 images and attempted to classify them into  
366 treated (CPT) or vehicle (DMSO). Although  
367 we allowed them to train after the initial trial,

368 investigators were unable to properly identify  
369 the very early changes in cell death. In fact,  
370 their results were practically random. How-  
371 ever, their low performance may be related to  
372 the fact that any regular cell culture exhibits  
373 some degree of cell death, and actually our  
374 experiments showed that a few cells in the  
375 control group displayed translocation of an-  
376 nexin V (Fig 1E and F). While this might con-  
377 stitute a potential confounding factor for the  
378 researcher, it does not apparently impact on  
379 CNN learning. As usual with whole-image-  
380 recognition approaches, it is not always pos-  
381 sible to clearly identify which image features  
382 shift the balance towards an accurate classifi-  
383 cation, though the model is probably recogniz-  
384 ing subtle alterations in cell membrane, cyto-  
385 plasmic vesicles and/or changes in the nuclear  
386 morphology proper of the ongoing cell death  
387 process.

388 In our experiments we found that DL al-  
389 gorithms can reach high accuracy values for  
390 detection of morphological changes in TLM  
391 images. Particularly, PSC lines produced bet-  
392 ter test results than CC lines in all conditions,  
393 indicating that CPT-induced features are per-  
394 haps more easily recognizable in the former.  
395 Consistently, the effects of CPT treatment col-  
396 lected by flow cytometry and immunofluores-  
397 cence were already visible by 1h in PSC lines,  
398 while it took no less than 3h and higher CPT  
399 concentrations to achieve similar results in CC  
400 lines. In line with our observations, previ-  
401 ous results demonstrated that pluripotent cells  
402 were in fact more sensitive to CPT treatment  
403 compared to differentiated cells (Liu et al.,  
404 2013; García et al., 2016) and it is also pos-  
405 sible that the accumulation of mutations asso-  
406 ciated with cancer cell lines could have con-  
407 ferred some degree of tolerance against DNA  
408 damage.

409 Improving training results of a CNN is not  
410 an easy challenge. While it is true that im-

plementing models based on widely known ar- 411  
chitectures (e.g. ResNet50) incorporates many 412  
standard settings and default hyperparameter 413  
values, fine-tuning a model is typically an em- 414  
pirical endeavour. One of the major determi- 415  
nants in achieving well-trained models relies 416  
on the number of samples employed in the run 417  
(Kavzoglu, 2009; Mathur and Foody, 2008). 418  
This was clearly demonstrated when we fur- 419  
ther explored the capabilities of our model by 420  
introducing more labels to the same training 421  
set (less images per label), which resulted in 422  
a weaker performance. Instead of the initial 423  
binary setting (CPT vs. DMSO), in this case 424  
labels included the name of each cell line as 425  
well (ALL vs. ALL) culminating in accu- 426  
racy values on the test set that dropped nearly 427  
15%. When increasing sample size is not fea- 428  
sible, there are still several options to enhance 429  
performance (e.g. data augmentation, learn- 430  
ing rates adjustment). The use of pretrained 431  
models that carry weights information from 432  
training on benchmark datasets like ImageNet 433  
(transfer learning), might help to reduce train- 434  
ing time and generalization errors (prediction) 435  
(Yosinski et al., 2014). 436

Besides the proof of concept regarding the 437  
ability of NN for cell death detection, we also 438  
provide a set of scripts wrapped in a python- 439  
based tool for a straightforward implementa- 440  
tion of this technology. In everyday labora- 441  
tory practice, this may be a significant advan- 442  
tage for designing and running experiments as 443  
it is possible to scale-up throughput and more 444  
importantly readout. In particular, the use 445  
of these technologies together with automa- 446  
tion in highly repetitive assays should increase 447  
reproducibility and reduce costs. With min- 448  
imal knowledge on deep learning and com- 449  
mand line usage, any researcher can run our 450  
scripts to get results similar to ours on their 451  
own sets of images. 452

In conclusion, we found that DL can be ap- 453

454 plied for cell death recognition in transmit-  
455 ted light microscopy images and we provide  
456 a user-friendly tool to be implemented in any  
457 lab working on cell death.

## 458 **Materials and methods**

### 459 *Cell culture and cell death induction*

460 The four cancer cell lines and the three  
461 pluripotent stem cells used in this analysis  
462 were kept in a humidified air-filtered atmo-  
463 sphere at 37°C and 5% CO<sub>2</sub>. Osteosar-  
464 coma U2OS cells and breast cancer MCF7  
465 cells were routinely cultured in Dulbecco's  
466 Modified Eagle Medium (ref. 12430054,  
467 DMEM; Thermo Fisher Scientific, United  
468 States) supplemented with 10% fetal bovine  
469 serum (NTC-500, FBS; Natocor, Argentina)  
470 and 1% penicillin/streptomycin (ref. 15140-  
471 122, Pen/Strep; Thermo Fisher Scientific,  
472 United States), while prostate cancer PC3 cells  
473 and breast cancer T47D cells were cultured in  
474 Roswell Park Memorial Institute medium (ref.  
475 22400089, RPMI; Thermo Fisher Scientific,  
476 United States) supplemented with 10% FBS  
477 and Pen/Strep. Induced pluripotent stem cells  
478 (iPS1 and iPS2, both previously developed in  
479 our lab (Questa et al., 2016)) and embryonic  
480 stem cells (H9) were maintained on Geltrex<sup>TM</sup>  
481 (ref. A1413302; Thermo Fisher Scientific,  
482 United States)-coated dishes using Essential 8  
483 flex defined medium (ref. A2858501, E8 flex;  
484 Thermo Fisher Scientific, United States), re-  
485 placing it each day. All cells were detached  
486 with TrypLE<sup>TM</sup> Select 1X (ref. A1217702;  
487 Thermo Fisher Scientific, United States) every  
488 4 or 5 days depending on density. For death  
489 induction experiments, approximately 3x10<sup>5</sup>  
490 cells were seeded in the 4 central wells of  
491 12-well dishes (ref. 3513; CORNING Inc.,  
492 United States), thus reducing potential border  
493 effects. The following day cancer cells were  
494 serum-deprived for 24h and then all cell lines

495 were treated either with camptothecin 1-10μM  
496 (ref. C9911, CPT; Sigma-Merck, Argentina)  
497 or DMSO (ref. D2660, dimethyl sulfoxide;  
498 Sigma-Merck, Argentina) for the times indi-  
499 cated in experiments. To prevent addition of  
500 high doses of DMSO in high-concentration  
501 CPT treatments, more concentrated stock so-  
502 lutions were employed. Transmitted light mi-  
503 croscopy images were taken immediately be-  
504 fore adding the treatments and every hour un-  
505 til conclusion. Summarized information and  
506 further details on cell lines can be found in S1  
507 Table.

### 508 *DNA damage assessment*

509 Immunostaining was performed as previ-  
510 ously described (Moro et al., 2018) with minor  
511 modifications. Briefly, cells treated with CPT  
512 or DMSO were fixed in 4% paraformalde-  
513 hyde for 30min at room temperature and  
514 washed 3 times with PBS. Then, they were  
515 permeabilized in 0.1% bovine serum albu-  
516 min (BSA)/PBS and 0.1% Triton X-100 so-  
517 lution for 1h, followed by blocking in 10%  
518 normal goat serum/PBS and 0.1% Tween20  
519 solution. Incubation with primary antibod-  
520 ies against γH2AX (rabbit IgG, ref. ab2893;  
521 Abcam, United States) and p53 (mouse IgG,  
522 ref. ab1101; Abcam, United States) were per-  
523 formed overnight at 4°C in 1:100 dilutions  
524 in blocking solution and later secondary anti-  
525 body incubation with Alexa Fluor 594 (anti-  
526 mouse, ref. R37121; Thermo Fisher Scien-  
527 tific, United States) and Alexa Fluor 488 (anti-  
528 rabbit, ref. A11034; Thermo Fisher Scientific,  
529 United States) was done in the dark at room  
530 temperature for 1h together with DAPI. Cells  
531 were washed and then imaged on EVOS flu-  
532 orescence microscope (Thermo Fisher Scien-  
533 tific, United States). Nonspecific secondary  
534 antibody binding was evaluated in the ab-  
535 sence of primary antibodies. Images from four  
536 fields of three independent replicates were pro-



537 cessed and analysed automatically using cus-  
538 tom macro scripts (ImageJ software) to de-  
539 termine mean fluorescent intensity per nu-  
540 cleus and statistical significance between CPT-  
541 treated and vehicle-treated cell populations  
542 was evaluated by Welch Two Sample t-test us-  
543 ing R.

#### 544 *AnnexinV assay*

545 Translocation of phosphatidylserine (PS)  
546 residues in apoptotic cells was detected with  
547 AnnexinV-FITC (ref. 556547; BD Pharmin-  
548 gen, United States) and AnnexinV-PE (ref.  
549 559763; BD Pharmingen, United States) com-  
550 mercial kits, following instructions from man-  
551 ufacturer. Untreated and treated cells (CPT  
552 or DMSO) were collected from wells with  
553 TrypLE<sup>TM</sup> 1X (including supernatants), incu-  
554 bated with reagents provided in the kit and fi-  
555 nally ran on BD Accuri Flow Cytometer. Re-  
556 sults from three independent replicates were  
557 analysed using FlowJo (v7.6) software and  
558 statistical significance between CPT-treated  
559 and DMSO-treated cell populations from third  
560 quadrant (Q3) was evaluated by Welch Two  
561 Sample t-test using R.

#### 562 *Transmitted light imaging*

563 Cell images were captured in EVOS micro-  
564 scope using a 20x objective and setting light  
565 intensity at 40%. Between 30 and 50 images  
566 were taken across each of the 4 central wells  
567 (2 with CPT and 2 with DMSO) of multiwell  
568 plates (4 independent experiments) for each of  
569 the 7 cell lines described in *Cell culture and*  
570 *cell death induction*, avoiding field overlap-  
571 ping or any places with few or no cells and  
572 stored as png files. Size of these images was  
573 originally 960x1280 pixels, though we applied  
574 a short python script (image-slicer) to slice  
575 them into four parts in order to obtain four

images from each one (480,640,3). This pro- 576  
duced a total of 58596 images considering all 577  
timepoints (0, 1, 2 and 3h). 578

#### *Deep learning analysis* 579

For deep learning training and predic- 580  
tion, we used fast.ai (v1.0.60), a frontend 581  
of PyTorch (v1.4). Briefly, training was 582  
done by using several different convolutional 583  
neural networks. ResNet50 architecture (He 584  
et al., 2015; Huang et al., 2016; Howard 585  
et al., 2018), however, was chosen among 586  
different options (ResNet34, ResNet101 and 587  
DenseNet121) because it rendered excellent 588  
results and it is widely known. Specifications 589  
on the CNN may be found in S2 Table. For 590  
analyses, images from all cell lines were 591  
split in four as previously explained result- 592  
ing in a total of 15224 images from 1h, 15312 593  
from 2h and 15032 from 3h treatments. We 594  
assigned an entire independent experiment 595  
(1 of 4) as the test set and then randomly 596  
divided the other 3 into 70% for training and 597  
30% for validation. Final number of images 598  
in each set for all conditions assayed in this 599  
work are detailed in S3 Table. Pretrained 600  
model weights were obtained from available 601  
trainings on benchmark ImageNet dataset. 602  
Class activation maps (CAM) were con- 603  
structed following specifications by the fastai 604  
project using CPT-treated and DMSO-treated 605  
random PSC images (Zhou et al., 2015). A 606  
python script with details on hyperparameter 607  
values used during trainings is available 608  
in <https://github.com/miriukaLab/celldeath>. 609  
Hardware specifications may be found in 610  
[celldeath/blob/master/machineDetails.md](https://github.com/miriukaLab/celldeath/blob/master/machineDetails.md). 611

#### **Data Availability** 612

All images used for training are available upon 613  
request. 614

## 615 Acknowledgments

616 We would like to thank Instituto Fleni-  
617 CONICET and Pérez Compañc Foundation for  
618 their continuous support. Also, we extend our  
619 gratitude to Dr. Elba Vazquez, Dr. Adalí Pecci,  
620 Dr. Luciano Vellón, Dr. Martín Stortz and  
621 Dr. Alejandra Guberman for providing many  
622 of the cell lines used.

## 623 Declaration of Interests

624 The authors declare no competing interests.

## References

Anzanello, M.J., Fogliatto, F.S.. (2011). Learning curve models and applications: Literature review and research directions. *International Journal of Industrial Ergonomics* 41, 573 – 583. URL: <http://www.sciencedirect.com/science/article/pii/S016981411100062X>, doi:<https://doi.org/10.1016/j.ergon.2011.05.001>.

Camacho, D.M., Collins, K.M., Powers, R.K., Costello, J.C., Collins, J.J.. (2018). Next-generation machine learning for biological networks. *Cell* 173, 1581–1592. doi:10.1016/j.cell.2018.05.015.

Cao, C., Liu, F., Tan, H., Song, D., Shu, W., Li, W., Zhou, Y., Bo, X., Xie, Z.. (2018). Deep learning and its applications in biomedicine. *Genomics Proteomics Bioinformatics* 16, 17–32. doi:10.1016/j.gpb.2017.07.003.

Chen, C.L., Mahjoubfar, A., Tai, L.C., Blaby, I.K., Huang, A., Niazi, K.R., Jalali, B.. (2016). Deep learning in label-free cell classification. *Sci Rep* 6, 21471. doi:10.1038/srep21471.

Chen, S., Li, A., Lasick, K., Huynh, J., Powers, L., Roveda, J., Paek, A.. (2019). Weakly supervised deep learning for detecting and counting dead cells in microscopy images, in: 2019 18th IEEE International Conference On Machine Learning And Applications (ICMLA), pp. 1737–1743. doi:10.1109/ICMLA.2019.00282.

D’Arcy, M.S.. (2019). Cell death: a review of the major forms of apoptosis, necrosis and autophagy. *Cell Biol Int* 43, 582–592. doi:10.1002/cbin.11137.

Elmore, S.. (2007). Apoptosis: a review of programmed cell death. *Toxicol Pathol* 35, 495–516. doi:10.1080/01926230701320337.

García, C.P., Videla Richardson, G.A., Dimopoulos, N.A., Fernandez Espinosa, D.D., Miriuka, S.G., Sevlever, G.E., Romorini, L., Scassa, M.E.. (2016). Human pluripotent stem cells and derived neuroprogenitors display differential degrees of susceptibility to bh3 mimetics abt-263, wehi-539 and abt-199. *PLoS One* 11, e0152607. doi:10.1371/journal.pone.0152607.

García, C.P., Videla Richardson, G.A., Romorini, L., Miriuka, S.G., Sevlever, G.E., Scassa, M.E.. (2014). Topoisomerase i inhibitor, camptothecin, induces apoptogenic signaling in human embryonic stem cells. *Stem Cell Res* 12, 400–14. doi:10.1016/j.scr.2013.12.002.

He, K., Zhang, X., Ren, S., Sun, J.. (2015). Deep Residual Learning for Image Recognition. *ArXiv e-prints arXiv:1512.03385*.

Howard, J., Thomas, R., Gugger, S.. (2018). Fastai.

Huang, G., Liu, Z., van der Maaten, L., Weinberger, K.Q.. (2016). Densely Connected Convolutional Networks. *ArXiv e-prints arXiv:1608.06993*.

Jimenez-Carretero, D., Abrishami, V., Fernández-de Manuel, L., Palacios, I., Quílez-Álvarez, A., Díez-Sánchez, A., del Pozo, M.A., Montoya, M.C.. (2018). Tox\_(r)cnn: Deep learning-based nuclei profiling tool for drug toxicity screening. *PLOS Computational Biology* 14, 1–23. URL: <https://doi.org/10.1371/journal.pcbi.1006238>, doi:10.1371/journal.pcbi.1006238.

Kabore, A.F., Johnston, J.B., Gibson, S.B.. (2004). Changes in the apoptotic and survival signaling in cancer cells and their potential therapeutic implications. *Curr Cancer Drug Targets* 4, 147–63. doi:10.2174/1568009043481551.

Kavzoglu, T.. (2009). Increasing the accuracy of neural network classification using refined training data. *Environmental Modelling & Software* 24, 850 – 858. URL: <http://www.sciencedirect.com/science/article/pii/S1364815208002156>, doi:<https://doi.org/10.1016/j.envsoft.2008.11.012>.

Kay, J.G., Fairn, G.D.. (2019). Distribution, dynamics and functional roles of phosphatidylserine within the cell. *Cell Commun Signal* 17, 126. doi:10.1186/s12964-019-0438-z.

LeCun, Y., Bengio, Y., Hinton, G.. (2015). Deep learning. *Nature* 521, 436–44. doi:10.1038/nature14539.

Lee, J.G., Jun, S., Cho, Y.W., Lee, H., Kim, G.B., Seo, J.B., Kim, N.. (2017). Deep learning in medical imaging: General overview. *Korean J Radiol* 18,

- 570–584. doi:10.3348/kjr.2017.18.4.570.
- Liu, J.C., Guan, X., Ryan, J.A., Rivera, A.G., Mock, C., Agrawal, V., Agarwal, V., Letai, A., Lerou, P.H., Lahav, G.. (2013). High mitochondrial priming sensitizes hescs to dna-damage-induced apoptosis. *Cell Stem Cell* 13, 483–91. doi:10.1016/j.stem.2013.07.018.
- Majtnerová, P., Roušar, T.. (2018). An overview of apoptosis assays detecting dna fragmentation. *Mol Biol Rep* 45, 1469–1478. doi:10.1007/s11033-018-4258-9.
- Mathur, A., Foody, G.M.. (2008). Multiclass and binary svm classification: Implications for training and classification users. *IEEE Geoscience and Remote Sensing Letters* 5, 241–245. doi:10.1109/LGRS.2008.915597.
- Merino, D., Kelly, G.L., Lessene, G., Wei, A.H., Roberts, A.W., Strasser, A.. (2018). Bh3-mimetic drugs: Blazing the trail for new cancer medicines. *Cancer Cell* 34, 879–891. doi:10.1016/j.ccell.2018.11.004.
- Moen, E., Bannon, D., Kudo, T., Graf, W., Covert, M., Van Valen, D.. (2019). Deep learning for cellular image analysis. *Nat Methods* 16, 1233–1246. doi:10.1038/s41592-019-0403-1.
- Moro, L.N., Amin, G., Furmento, V., Waisman, A., Garate, X., Neiman, G., La Greca, A., Santín Velazque, N.L., Luzzani, C., Sevlever, G.E., et al.. (2018). Microrna characterization in equine induced pluripotent stem cells. *PLoS One* 13, e0207074. doi:10.1371/journal.pone.0207074.
- Nagata, S., Suzuki, J., Segawa, K., Fujii, T.. (2016). Exposure of phosphatidylserine on the cell surface. *Cell Death Differ* 23, 952–61. doi:10.1038/cdd.2016.7.
- Ounkomol, C., Seshamani, S., Maleckar, M.M., Collman, F., Johnson, G.R.. (2018). Label-free prediction of three-dimensional fluorescence images from transmitted-light microscopy. *Nat Methods* 15, 917–920. doi:10.1038/s41592-018-0111-2.
- Pérez-Enciso, M., Zingaretti, L.M.. (2019). A guide for using deep learning for complex trait genomic prediction. *Genes (Basel)* 10. doi:10.3390/genes10070553.
- Questa, M., Romorini, L., Blüguermann, C., Solari, C.M., Neiman, G., Luzzani, C., Scassa, M.É., Sevlever, G.E., Guberman, A.S., Miriuka, S.G.. (2016). Generation of ipsc line ipsc-fh2.1 in hypoxic conditions from human foreskin fibroblasts. *Stem Cell Res* 16, 300–3. doi:10.1016/j.scr.2015.12.026.
- Richmond, D., Jost, A.P.T., Lambert, T., Waters, J., Elliott, H.. (2017). Deadnet: Identifying phototoxicity from label-free microscopy images of cells using deep convnets. *arXiv:1701.06109*.
- Sedelnikova, O.A., Pilch, D.R., Redon, C., Bonner, W.M.. (2003). Histone h2ax in dna damage and repair. *Cancer Biol Ther* 2, 233–5. doi:10.4161/cbt.2.3.373.
- Sordet, O., Redon, C.E., Guirouilh-Barbat, J., Smith, S., Solier, S., Douarre, C., Conti, C., Nakamura, A.J., Das, B.B., Nicolas, E., et al.. (2009). Ataxia telangiectasia mutated activation by transcription- and topoisomerase i-induced dna double-strand breaks. *EMBO Rep* 10, 887–93. doi:10.1038/embor.2009.97.
- Strumberg, D., Pilon, A.A., Smith, M., Hickey, R., Malkas, L., Pommier, Y.. (2000). Conversion of topoisomerase i cleavage complexes on the leading strand of ribosomal dna into 5'-phosphorylated dna double-strand breaks by replication runoff. *Mol Cell Biol* 20, 3977–87. doi:10.1128/mcb.20.11.3977-3987.2000.
- Voulodimos, A., Doulamis, N., Doulamis, A., Protopadakis, E.. (2018). Deep learning for computer vision: A brief review. *Comput Intell Neurosci* 2018, 7068349. doi:10.1155/2018/7068349.
- Waisman, A., La Greca, A., Möbbs, A.M., Scaraffa, M.A., Santín Velazque, N.L., Neiman, G., Moro, L.N., Luzzani, C., Sevlever, G.E., Guberman, A.S., et al.. (2019). Deep learning neural networks highly predict very early onset of pluripotent stem cell differentiation. *Stem Cell Reports* 12, 845–859. doi:10.1016/j.stemcr.2019.02.004.
- Webb, S.. (2018). Deep learning for biology. *Nature* 554, 555–557. doi:10.1038/d41586-018-02174-z.
- Yosinski, J., Clune, J., Bengio, Y., Lipson, H.. (2014). How transferable are features in deep neural networks? *arXiv:1411.1792*.
- Zhou, B., Khosla, A., Lapedriza, A., Oliva, A., Torralba, A.. (2015). Learning deep features for discriminative localization. *arXiv:1512.04150*.

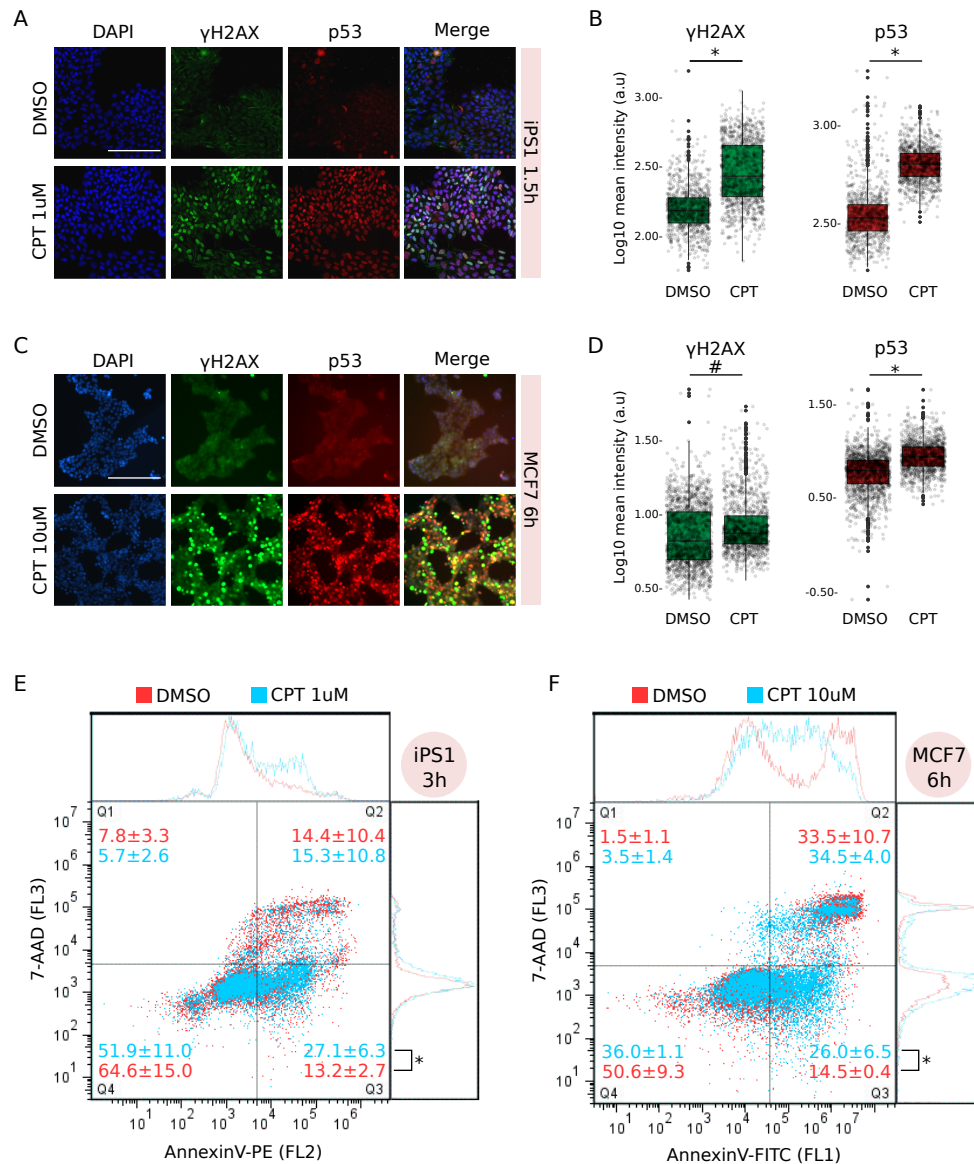

**Figure 1: Camptothecin treatment induced apoptosis in both iPS1 pluripotent stem cell and MCF7 cancer cell lines.** A) Immunostaining with anti- $\gamma$ H2AX and anti-p53 of iPS1 pluripotent cell line treated (CPT 1 $\mu$ M) or not (DMSO: vehicle) with CPT for 1.5h. Both marks were merged with DAPI to reveal cell nuclei and scale was set to 200 $\mu$ m (white bar). Images are representative of four different microscopic fields. B) Distribution of mean signal intensity per nucleus in all fields from A, measured in arbitrary units (log<sub>10</sub> a.u.) for  $\gamma$ H2AX (left) and p53 (right) marks. Statistical significance between CPT and DMSO was evaluated by Welch Two-Sample t-test (\*p-value=2.2e<sup>-16</sup>). C) Immunostaining as in A for MCF7 cancer cell line treated (CPT 10 $\mu$ M) or not with CPT for 6h. D) Mean signal intensity quantification and statistical significance were determined as in B (#p-value=4.89e<sup>-7</sup>; \*p-value=2.22e<sup>-16</sup>). E) Flow cytometry analysis with AnnexinV-PE of iPS1 cells treated with CPT 1 $\mu$ M (light blue) for 3h compared to DMSO (red). Incubation with 7-AAD was performed to discriminate dead cells (Q2) from early apoptotic (Q3). Number of events (cells) in each quadrant is presented as mean percentage of total population  $\pm$  SEM of three independent replicates. Statistical significance between conditions in Q3 was evaluated with Welch Two-Sample t-test (\*p-value=2.5e<sup>-2</sup>). F) MCF7 cancer cells treated with CPT 10 $\mu$ M (light blue) for 6h were analysed as in E, though using AnnexinV-FITC instead of PE.

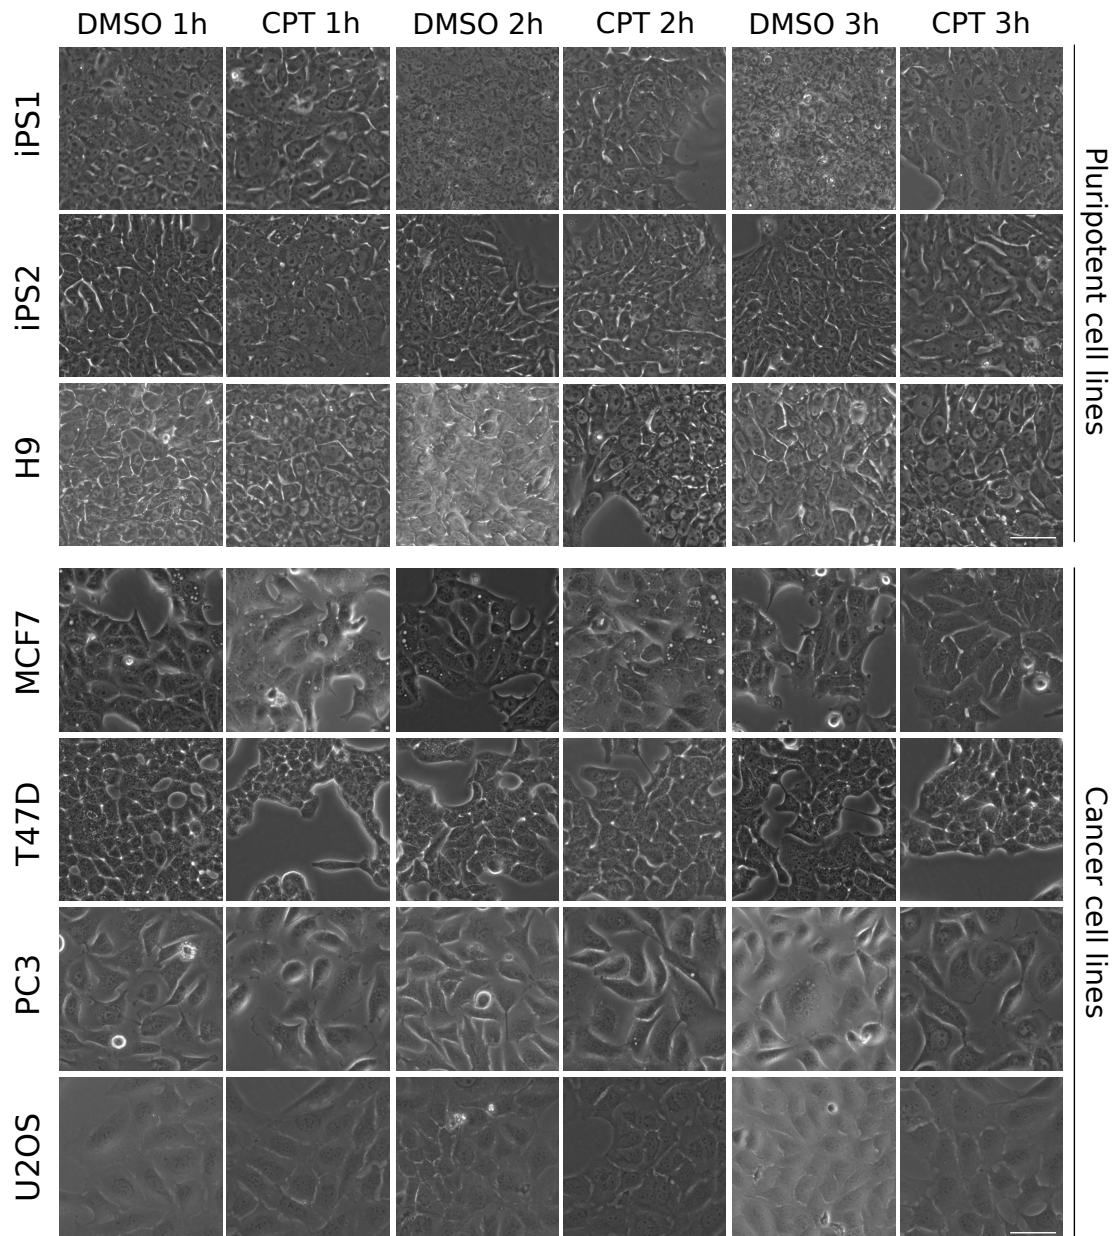

Figure 2: **Transmitted light images used for visual deep learning analysis.** Representative images of DMSO (vehicle)- and CPT-treated cell lines for 1, 2 and 3h. Scale bar is displayed in the pictures and equals to 50 $\mu$ m.

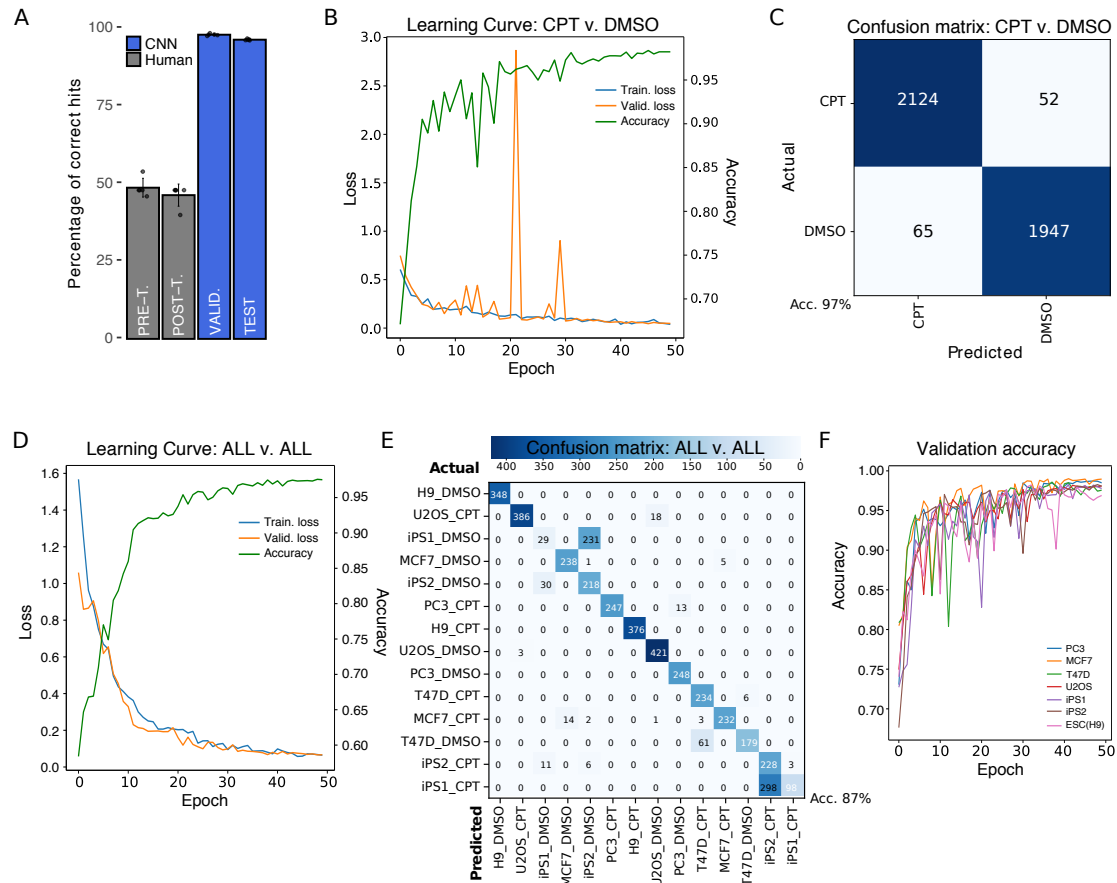

**Figure 3: Results of CNN training.** A) Comparison of human performance versus CNN. Pre ( $48.80 \pm 3.03\%$ ) and post-training ( $46.40 \pm 3.57\%$ ) results of five human subjects are shown compared to five separate runs of CNN training for a validation ( $98.18 \pm 0.33\%$ ) and a test set ( $96.58 \pm 0.24\%$ ). B) Representative Learning Curve of five independent CNN trainings using CPT and DMSO labels for 50 epochs. Accuracy curve for the same representative run is shown. C) Confusion matrix of CPT versus DMSO for training with highest test accuracy results. The highly accurate model led to very low false positives (65) and false negatives (52) during prediction on test set. D) Representative Learning Curve and accuracy of three independent CNN trainings using all cell lines and treatments as labels for 50 epochs. E) Confusion matrix of training with highest test accuracy results for all-versus-all analysis of test set. F) Validation accuracy results for training sets missing one cell line. The missing cell line was used as test set; testing accuracy for every run is shown in Table 2.

Table 1: Model performance for different conditions.

| Condition                       | Train. Loss | Val. Loss | Val. Acc. | Test Acc. |
|---------------------------------|-------------|-----------|-----------|-----------|
| <i>CPT</i> vs. <i>DMSO</i>      | 0.068       | 0.045     | 0.9837    | 0.9723    |
| <i>imagenet</i> ( <i>CvsD</i> ) | 0.055       | 0.051     | 0.9825    | 0.9790    |
| <i>ALL</i> vs. <i>ALL</i>       | 0.068       | 0.330     | 0.9979    | 0.8271    |
| <i>imagenet</i> ( <i>AvsA</i> ) | 0.029       | 0.035     | 0.9900    | 0.8658    |
| <i>PC3</i>                      | 0.138       | 0.041     | 0.986     | 0.955     |
| <i>MCF7</i>                     | 0.081       | 0.146     | 0.9528    | 0.9234    |
| <i>T47D</i>                     | 0.204       | 0.054     | 0.9746    | 0.8667    |
| <i>U2O2</i>                     | 0.141       | 0.002     | 1.000     | 0.9444    |
| <i>iPS1</i>                     | 0.379       | 0.056     | 0.998     | 0.970     |
| <i>iPS2</i>                     | 0.091       | 0.0007    | 1.000     | 0.948     |
| <i>ESC(H9)</i>                  | 0.007       | 0.002     | 1.000     | 0.996     |

Highest value of accuracy achieved in the test set (Test Acc.) among several trainings is presented for each condition at 1h. Corresponding values of the Loss function for training (Train. Loss) and validation (Val. Loss) are shown as well as accuracy on validation set (Val. Acc.). Results of running a pretrained model on *CPT* vs. *DMSO* (*imagenet CvsD*) and *ALL* vs. *ALL* (*imagenet AvsA*) conditions were included.

Table 2: Model performance after removing a cell line from training.

| Cell line out  | Train. Loss | Val. Loss | Val. Acc. | Test Acc. |
|----------------|-------------|-----------|-----------|-----------|
| <i>PC3</i>     | 0.053       | 0.032     | 0.9872    | 0.5283    |
| <i>MCF7</i>    | 0.054       | 0.038     | 0.9901    | 0.8688    |
| <i>T47D</i>    | 0.071       | 0.047     | 0.9858    | 0.7734    |
| <i>U2OS</i>    | 0.043       | 0.059     | 0.9800    | 0.6363    |
| <i>iPS1</i>    | 0.063       | 0.052     | 0.9820    | 0.9871    |
| <i>iPS2</i>    | 0.046       | 0.056     | 0.9826    | 0.9708    |
| <i>ESC(H9)</i> | 0.076       | 0.058     | 0.9822    | 0.9752    |

Removed cell line (Cell line out) was used for testing the model. Highest value of accuracy achieved during testing (Test Acc.) for each cell line is shown. Corresponding values of the Loss function for training (Train. Loss) and validation (Val. Loss) are shown as well as accuracy on validation set (Val. Acc.).

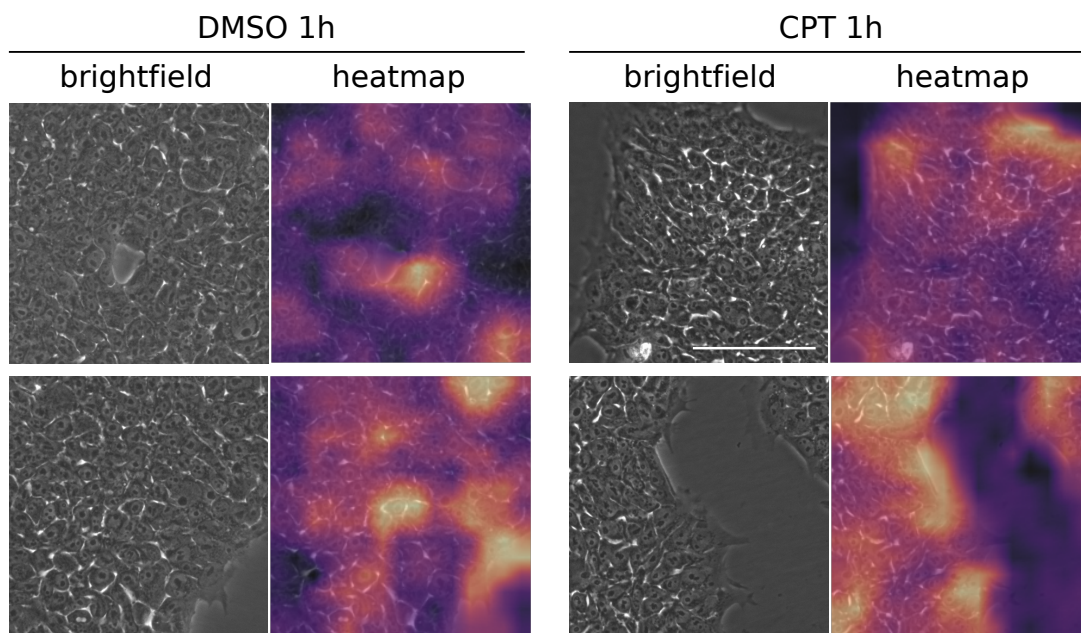

**Figure 4: Features contributing to classification.** Representative images of 1h CPT- and DMSO-treated PSC cells (brightfield) and corresponding class activation maps (heatmap). Areas in bright yellow indicate high activation for decision making and areas in purple correspond to low activation. Scale bar is displayed in the pictures and equals to 100 $\mu$ m.



## Supplemental information

**S1 Fig. Effect of longer CPT exposure times on  $\gamma$ H2AX and p53 staining and flow cytometry controls.** A) iPS1 cells were treated or not (DMSO) with CPT 1 $\mu$ M for 3 and 5h. Cells were stained with anti- $\gamma$ H2AX or anti-p53 and nuclei were revealed with DAPI. Scale was set to 200 $\mu$ m (white bar). B) MCF7 cells were treated or not (DMSO) with CPT 10 $\mu$ M for 8h. Cells were stained as in A. C) Controls used for setting background levels in iPS1 flow cytometry experiments. D) Controls used for setting background levels in MCF7 flow cytometry experiments.

**S2 Fig. Human trials.** Detailed results of five subjects involved in scientific activities tested for their capacity to discriminate cells treated with CPT from DMSO before (Pre-) and after (Post-) being trained with a different set of images.

**S3 Fig. Neural Network performance.** A) Comparison of accuracy results between ResNet50 and ResNet34 architectures using the same input data and parameters. B) Learning curve (training and validation sets) for ResNet50 architecture during extended training (400 epochs). Point of inflection in validation curve is indicated with an arrow inside the inset box. Validation accuracy for the training run is also shown. C) Confusion matrix for images of 2h CPT/DMSO-treated cells. D) Confusion matrix for images of 3h CPT/DMSO-treated cells.

**S1 Table. Description of cell lines used in this work.**

**S2 Table. Deep learning model specifications.**

**S3 Table. Number of images per condition.**
